# Supplementary material for: The Influence of Competitive Level on Stretch-Shortening Cycle Function in Young Female Gymnasts
Source: MDPI journal article supplement (doi:10.3390/sports10070107), 2022-07-06
Supplement: s1 [file s1]

**Table S1.** Drop jump variables description

| Variable                                         | Units           | Description                                                                                                                                                                                                           |
|--------------------------------------------------|-----------------|-----------------------------------------------------------------------------------------------------------------------------------------------------------------------------------------------------------------------|
| Jump height                                      | m               | The greatest vertical displacement of the centre of mass during the flight time. This was calculated using methods by Leard (Leard et al. 2007).                                                                      |
| Ground contact time (CT)                         | s               | The time interval of the ground contact of the first landing. This was established using the first data point greater than 15 N (i.e. initial ground contact) and the final data point that exceeded 15 N (take-off). |
| Reactive strength index (RSI)                    | Arbitrary units | The ratio between jump height (mm) and first ground contact time (ms).                                                                                                                                                |
| Peak centre of mass displacement ( $\Delta$ COM) | m               | The peak vertical displacement of the body's centre of mass during the first ground contact.                                                                                                                          |
| Spring-like correlation                          | Arbitrary units | The correlation between centre of mass displacement and absolute vertical force throughout the first ground contact.                                                                                                  |
| Relative braking peak force                      | BW              | The highest transient, visible force peak during the landing phase divided by bodyweight.                                                                                                                             |
| Time of landing peak force                       | %               | Time interval between the first landing and landing peak as a percentage of total ground contact time.                                                                                                                |
| Relative propulsive peak force                   | BW              | The highest transient, visible force peak during the take-off phase divided by bodyweight.                                                                                                                            |
| Net impulse                                      | (N.s)           | Total impulse during the first ground contact minus bodyweight impulse.                                                                                                                                               |
| Braking impulse                                  | (N.s)           | The sum of impulse between the first landing and the peak centre of mass displacement.                                                                                                                                |
| Propulsive impulse                               | (N.s)           | The sum of impulse between the peak centre of mass displacement and take-off.                                                                                                                                         |
| Braking duration                                 | (s)             | The time interval between the first landing and the peak centre of mass displacement.                                                                                                                                 |
| Propulsive duration                              | (s)             | The time interval between the peak centre of mass displacement and take-off.                                                                                                                                          |
| Ratio of braking: propulsive impulse             | Arbitrary units | Braking impulse divided by propulsive impulse.                                                                                                                                                                        |
